# Supplementary material
Source: PubMed Central journal article supplement (PMC2799844)
Supplement: 0907732106_0907732106SI.pdf [file 0907732106_0907732106SI.pdf]

# Supporting Information

Phillips and Milo 10.1073/pnas.0907732106

**Table S1. Database vital statistics**

|                                            |        |
|--------------------------------------------|--------|
| Number of entries                          | ≈4,500 |
| Number of distinct references              | ≈1,000 |
| Number of organisms                        | ≈200   |
| Unique visitors per day                    | ≈150   |
| Searches performed in BioNumbers per month | ≈4,000 |

---

**Table S2. Top keywords leading to BioNumbers entries from search engines based on Google analytics**

Average size of a yeast gene  
Protein diameter  
Zebrafish GC content  
Average protein size  
*E. coli* generation time  
mRNA length  
Volume of water molecule  
ldh kcat  
Database kcat  
*E. coli* doubling time  
Guinea pig chromosome number  
18 s subunit  
Average mRNA length  
Bionumbers *S. cerevisiae*  
CHO cell diameter  
Generation time *E. coli*  
OD<sub>600</sub> bacteria  
Optical density bacteria  
Osmolarity of sea water  
Algae genome size  
ATP produced per g dry cell WT chlorella algae  
Cell dry weight  
Chloroplast length  
*E. coli* OD<sub>600</sub>

---

**Table S3. Most frequent search terms, estimation based on BioNumbers search log**

Doubling time  
Genome  
Translation rate  
Ribosome  
Largest/longest gene  
Cell cycle  
Transcription  
Replication rate *E. coli*  
Glucose  
Average weight of ribosome  
Protein size  
Nucleus  
EGFP  
Dissociation rate  
Binding rate  
Size (bacteria *E. coli*)  
Dissociation  
Binding  
RNA polymerase  
RNA polymerase copies per cell  
Ribosome size  
mRNA  
GC content  
Total RNA (budding yeast)  
Acetyl CoA  
Glucose  
Protein synthesis rate  
Mitochondria  
Generation time (bacteria *Staphylococcus aureus*)

---

**Table S4. Most frequently viewed BioNumbers properties**

Rate of translation by ribosome (bacteria *E. coli*)  
 Cell dry weight (bacteria *E. coli*)  
 Minimal generation time (bacteria *E. coli*)  
 MW of ribosome (bacteria *E. coli*)  
 Median cell volume of a haploid budding yeast in glucose medium (S288c background) (budding yeast)  
 Absolute abundance of p53 in cell (human *Homo sapiens*)  
 Doubling time of cancerous cell lines (human *H. sapiens*)  
 Number of ribosomes/cell (bacteria *E. coli*)  
 Average diameter of average protein (bacteria *E. coli*)  
 Volume of ribosome (bacteria *E. coli*)  
 Diameter of ribosome (bacteria *E. coli*)  
 Rate of elongation reaction: Ribosome + RNAn > Ribosome-RNAn + 1 (bacteria *E. coli*)  
 Number of ribosomes in midlog phase growth (bacteria *Sphingomonas* sp. strain RB2256)  
 Concentration of glucose (amoeba *Dictyostelium discoideum*)  
 Number of protein types to make ribosome (bacteria *E. coli*)  
 Maximum ATP yield from full oxidation of one molecule of glucose (generic)  
 Number of rRNA types to make ribosome (bacteria *E. coli*)  
 Carbon dioxide solubility in water at 25 ° C (generic)  
 Average length of mRNA (bacteria *E. coli*)  
 Rule of thumb for cell volume (bacteria *E. coli*)  
 Average size of protein bacteria (*E. coli*)  
 Population doubling time, percent budded cells, and mean cell volume for different batch culture media (budding yeast *Saccharomyces cerevisiae*)  
 Envelope volume (bacteria *E. coli*)  
 Cell wet weight (bacteria *E. coli*)  
 Minimal generation time (bacteria *Vibrio natriegens*)  
 Total dissolved inorganic carbon concentration in ocean water (Biosphere)  
 Cell dry weight (bacteria *E. coli*)  
 Cell concentration for culture with OD<sub>600</sub> of 0.1 (bacteria *E. coli*)  
 Concentration of G 6P (bacteria *E. coli*)  
 Average size of mRNA (bacteria *E. coli*)

---

**Table S5. Delivering materials to build a cell**

| Property                                          | Value                                                               | Reference                                                                                                                                                                                                                                                                      |
|---------------------------------------------------|---------------------------------------------------------------------|--------------------------------------------------------------------------------------------------------------------------------------------------------------------------------------------------------------------------------------------------------------------------------|
| Doubling time under ideal conditions              | $\approx 1,000$ s                                                   | BNID 100260; 17–20 min                                                                                                                                                                                                                                                         |
| Transporter turnover rate                         | $\approx 100 \text{ s}^{-1}$ (where $\wedge$ means to the power of) | BNID 102931, 101737, 101738, 101739                                                                                                                                                                                                                                            |
| Surface area of the membrane                      | $6 \mu\text{m}^2 = 6 \times 10^6 \text{ nm}^2$                      | BNID 103339                                                                                                                                                                                                                                                                    |
| Transporter area in membrane                      | $\approx 14 \text{ nm}^2$                                           | $\pi/4 \times 6 \text{ nm} \times 3 \text{ nm}$ ; BNID 102929                                                                                                                                                                                                                  |
| Carbon atoms in cell                              | $\approx 10^{10}$                                                   | BNID 103010                                                                                                                                                                                                                                                                    |
| Required glucose molecules imported into the cell | $\approx 2 \times 10^9$                                             | $\approx \text{Carbon atoms}/6$                                                                                                                                                                                                                                                |
| Transporters fraction in membrane                 | $\sim 0.04 - 4\%$                                                   | (Number of transporters required) $\times$ (fraction of membrane area taken by each transporter)<br>$= (2 \times 10^9 \text{ (molecules)})/1,000 \text{ (s)}/100 \text{ (molecules/transporter/s)}$<br>$\times (14 \text{ (nm}^2\text{)})/6 \times 10^6 \text{ (nm}^2\text{)}$ |

**Table S6. Global mass of Rubisco**

| Property                                                           | Value                                                                                                                                                                                                                                                         | Reference                                         |
|--------------------------------------------------------------------|---------------------------------------------------------------------------------------------------------------------------------------------------------------------------------------------------------------------------------------------------------------|---------------------------------------------------|
| Global net carbon fixation per year (net primary productivity)     | $\approx 100 \text{ Gt} = 10^{17} \text{ g carbon/year}$                                                                                                                                                                                                      | BNID 102933                                       |
| Gross to net primary productivity                                  | 2                                                                                                                                                                                                                                                             | Because of respiration, BNID 103802               |
| Seconds in a year                                                  | $3 \times 10^7$                                                                                                                                                                                                                                               | $= 60 \times 60 \times 24 \times 365$             |
| Rubisco maximal carbon fixation rate                               | 2–10 carbon per s                                                                                                                                                                                                                                             | BNID 103708                                       |
| Molecular weight Rubisco                                           | $7 \times 10^4 \text{ g/mole Rubisco monomer}$                                                                                                                                                                                                                |                                                   |
| Rubisco effective rate of carbon fixation averaged over conditions | $\approx 1 \text{ carbon per s}$                                                                                                                                                                                                                              | Rough estimation based on daily and yearly cycles |
| Molecular weight carbon                                            | 12 g/mole                                                                                                                                                                                                                                                     |                                                   |
| Human global population                                            | $\approx 7 \times 10^9$                                                                                                                                                                                                                                       | As of 2009                                        |
| Mass of functional Rubisco globally                                | $(10^{17} \text{ g carbon/year}) \times 2 \times (7 \times 10^4 \text{ g/mole Rubisco monomer}) / (3 \times 10^7 \text{ s/year}) / (1 \text{ carbon molecules/s}) / (12 \text{ g/mole carbon})$<br>$4 \times 10^{13} \text{ g} = 4 \times 10^{10} \text{ kg}$ | $\approx 5 \text{ kg/person on Earth}$            |
